# Supplementary material for: Impact of an Education-Based Antimicrobial Stewardship Program on the Appropriateness of Antibiotic Prescribing: Results of a Multicenter Observational Study
Source: PubMed Central journal article supplement (PMC8002962; doi:10.3390/antibiotics10030314), 2021-03-17
Supplement: antibiotics-10-00314-s001.pdf [file antibiotics-10-00314-s001.pdf]

**Supplementary Table S1. Main classes of antimicrobials used in ASP and non-ASP and way of administration**

| <b>Variables</b>                        | <b>ASP, N(%)</b> | <b>non-ASP, N(%)</b> | <b>P value</b> |
|-----------------------------------------|------------------|----------------------|----------------|
| <i>Antibiotics</i>                      |                  |                      |                |
| Aminopenicillin, N° (%)                 | 9 (21.9)         | 49 (29.3)            | 0.1            |
| Piperacillin/tazobactam, N° (%)         | 4 (9.7)          | 26 (15.6)            | 0.16           |
| Carbapenem, N° (%)                      | 3 (7.3)          | 10 (6)               | 0.93           |
| First-generation cephalosporins, N° (%) | 13 (53.6)        | 17 (10.2)            | 0.01           |
| Third-generation cephalosporins, N° (%) | 3 (7.3)          | 35 (20.9)            | 0.01           |
| Macrolides, N° (%)                      | 4 (9.7)          | 3 (1.8)              | 0.04           |
| Lincosamides, N° (%)                    | 2 (4.9)          | 0 (0)                | 0.01           |
| Aminoglycoside, N° (%)                  | 0 (0)            | 9 (5.4)              | 0.09           |
| Quinolones, N° (%)                      | 1 (2.4)          | 29 (17.4)            | 0.006          |
| Glycopeptides, N° (%)                   | 6 (14.6)         | 7 (4.2)              | 0.059          |
| Oxazolidinone, N° (%)                   | 2 (4.9)          | 2 (1.2)              | 0.22           |
| Cotrimoxazole, N° (%)                   | 3 (7.3)          | 3 (1.8)              | 0.14           |
| Metronidazole, N° (%)                   | 2 (4.9)          | 13 (7.8)             | 0.32           |
| Colistin, N° (%)                        | 2 (4.9)          | 0 (0)                | 0.01           |
| Lipopeptide, N° (%)                     | 0 (0)            | 1 (0.6)              | 0.57           |
| Tygeciclina, N° (%)                     | 0 (0)            | 1 (0.6)              | 0.57           |
| Azole, N° (%)                           | 1 (2.4)          | 5 (3)                | 0.67           |
| Echinocandin/Amphotericin B, N° (%)     | 0 (0)            | 3 (2)                | 0.33           |
| Antituberculosis Agents, N° (%)         | 4 (9.7)          | 0 (0)                | <0.001         |
| <i>Way of administration</i>            |                  |                      |                |
| Oral, N° (%)                            | 9 (15.5)         | 29 (13.5)            | 0.95           |
| Intravenously, N° (%)                   | 49 (84.5)        | 186 (86.5)           | 0.1            |
